# Supplementary material
Source: Elsevier journal article supplement (https://www.sciencedirect.com/science/article/pii/S1578219016000299)
Supplement: mmc1 [file S1578219016000299:mmc1.pdf]

Table S1 (Supplementary Material): Levels of evidence and grades of recommendation for questions not related to diagnosis

|     | Levels of Evidence                                                                                                                                                                                 |                                                | Grades of Recommendation                                                                                                                                                                                                                                         |
|-----|----------------------------------------------------------------------------------------------------------------------------------------------------------------------------------------------------|------------------------------------------------|------------------------------------------------------------------------------------------------------------------------------------------------------------------------------------------------------------------------------------------------------------------|
| 1++ | High quality meta-analyses, systematic reviews of RCTs, or RCTs with very low risk of bias                                                                                                         | A                                              | At least one meta-analysis, systematic review, or RCT classified as 1++ and directly applicable to the target population of the guidelines; or a body of evidence consisting principally of studies rated as 1+ and demonstrating overall consistency of results |
| 1+  | Well-conducted meta-analyses, systematic reviews of RCTs, or RCTs with a low risk of bias                                                                                                          |                                                |                                                                                                                                                                                                                                                                  |
| 1-  | Meta-analyses, systematic reviews of RCTs, or RCTs with a high risk of bias                                                                                                                        | Not recommended as a basis for recommendations |                                                                                                                                                                                                                                                                  |
| 2++ | High quality systematic reviews of case control or cohort studies. High quality case control or cohort studies with a very low risk of bias and a high probability that the relationship is causal | B                                              | A body of evidence including studies rated as 2++, directly applicable to the target population of the guidelines, and demonstrating overall consistency of results; or evidence extrapolated from studies rated as 1++ or 1+                                    |
| 2+  | Well-conducted case control cohort studies with a low risk of bias and a moderate probability that the relationship is causal                                                                      | C                                              | A body of evidence including studies rated as 2+, directly applicable to the target population of the guidelines, and demonstrating overall consistency of results; or evidence extrapolated from studies rated as 2++                                           |
| 2-  | Case control or cohort studies with a high risk of bias and a significant risk that the relationship is not causal                                                                                 | Not recommended as a basis for recommendations |                                                                                                                                                                                                                                                                  |
| 3   | Non-analytic studies, such as case reports and case series                                                                                                                                         | D                                              | Evidence level 3 or 4; or evidence extrapolated from studies rated as 2+                                                                                                                                                                                         |
| 4   | Expert opinion                                                                                                                                                                                     |                                                |                                                                                                                                                                                                                                                                  |
|     |                                                                                                                                                                                                    | √                                              | Recommended best practice based on the clinical experience of the consensus guideline development group                                                                                                                                                          |

Abbreviations: RCT, randomized clinical trial

Table s2 (Supplementary Material): Levels of Evidence and Grades of Recommendation for Questions Relating to Diagnosis

| Levels of Evidence | Type of Evidence                                              | Types of Studies                                                                                                                                                                                                                                                                                                                                                                                                                                 | Grades of Recommendation |
|--------------------|---------------------------------------------------------------|--------------------------------------------------------------------------------------------------------------------------------------------------------------------------------------------------------------------------------------------------------------------------------------------------------------------------------------------------------------------------------------------------------------------------------------------------|--------------------------|
| Ia                 | Systematic review (with homogeneity) of Level 1 studies       | Level 1. Meet the following criteria:<br>- Blinded comparison with valid reference standard (gold standard)<br>- Appropriate spectrum of patients                                                                                                                                                                                                                                                                                                | A                        |
| Ib                 | Level 1 studies                                               |                                                                                                                                                                                                                                                                                                                                                                                                                                                  |                          |
| II                 | Level 2 studies.<br>Systematic review of Level 2 studies      | Level 2. Present only one of the following confounding factors:<br>- Unrepresentative population (the sample does not reflect the population in which the test will be applied)<br>- Comparison with an inadequate reference standard (gold standard) (the test being assessed is part of the gold standard or the test result influenced the decision to perform the gold standard).<br>- Comparison without blinding<br>- Case-control studies | B                        |
| III                | Level 3 studies.<br>Systematic review of level 3 studies      | Level 3. Presenting 2 or more of the confounding factors described in the description of Level 2 studies                                                                                                                                                                                                                                                                                                                                         | C                        |
| IV                 | Consensus, expert opinion without explicit critical appraisal |                                                                                                                                                                                                                                                                                                                                                                                                                                                  | D                        |
